# Supplementary material
Source: PubMed Central journal article supplement (PMC6682473)
Supplement: NIHMS1517436-supplement-supplemental_table.pdf [file NIHMS1517436-supplement-supplemental_table.pdf]

**Supplementary Table 1****Subjects with multiple interventions**

| <b>Subject</b> | <b>Intervention</b> | <b>Prior intervention</b> | <b>Follow-up duration (years)</b> | <b>5-min column area (cm<sup>2</sup>)</b> | <b>Anatomy</b> | <b>Eckardt Score</b> | <b>DI</b> | <b>MxEGJD</b> |
|----------------|---------------------|---------------------------|-----------------------------------|-------------------------------------------|----------------|----------------------|-----------|---------------|
| 1              | LHM                 | LHM                       | 14                                | 56                                        | NI             | 5                    | 1.6       | 11.5          |
| 2              | PD 35               | PD 30                     | .67                               | 52                                        | NI             | 9                    | 1.3       | 12.4          |
| 3              | PD 30               | LHM                       | 13                                | 43                                        | Sig            | 4                    | 4.9       | 13.4          |
| 4              | PD 30               | PD 30                     | 11                                | 1                                         | NI             | 3                    | 3.7       | 16.6          |
| 5              | LHM                 | LHM                       | .67                               | 35                                        | NI             | 6                    | 2.7       | 16.6          |
| 6              | PD 35               | PD 30                     | 6                                 | 4                                         | NI             | 3                    | 4.6       | 18.6          |
| 7              | LHM                 | LHM                       | 3.33                              | 18                                        | St             | 4                    | 11.9      | 16.9          |
| 8              | LHM                 | POEM                      | 1.75                              | 22                                        | St             | 3                    | 36.1      | 18.0          |
| 9              | PD 40               | LHM                       | .25                               | 5                                         | Psd            | 9                    | 5.3       | 19.0          |
| 10             | POEM                | POEM                      | .67                               | 37                                        | Sig            | 1                    | 12.2      | 23.1          |

Descriptive statistics for patients with multiple interventions. Follow-up duration is after the most recent intervention.

Abbreviations: DI: distensibility index, LHM: laparoscopic heller myotomy, MxEGJD: maximal EGJ diameter, NI: normal, PD: pneumatic dilation, POEM: per-oral endoscopic myotomy, Psd: pseudodiverticulum, Sig: sigmoid, St: sinktrap,
